# Supplementary material for: Phylogenetic Characterization of Fecal Microbial Communities of Dogs Fed Diets with or without Supplemental Dietary Fiber Using 454 Pyrosequencing
Source: PubMed Central journal article supplement (PMC2842427; doi:10.1371/journal.pone.0009768), 2010-03-22
Supplement: pone.0009768.s001.pdf [file pone.0009768.s001.pdf]

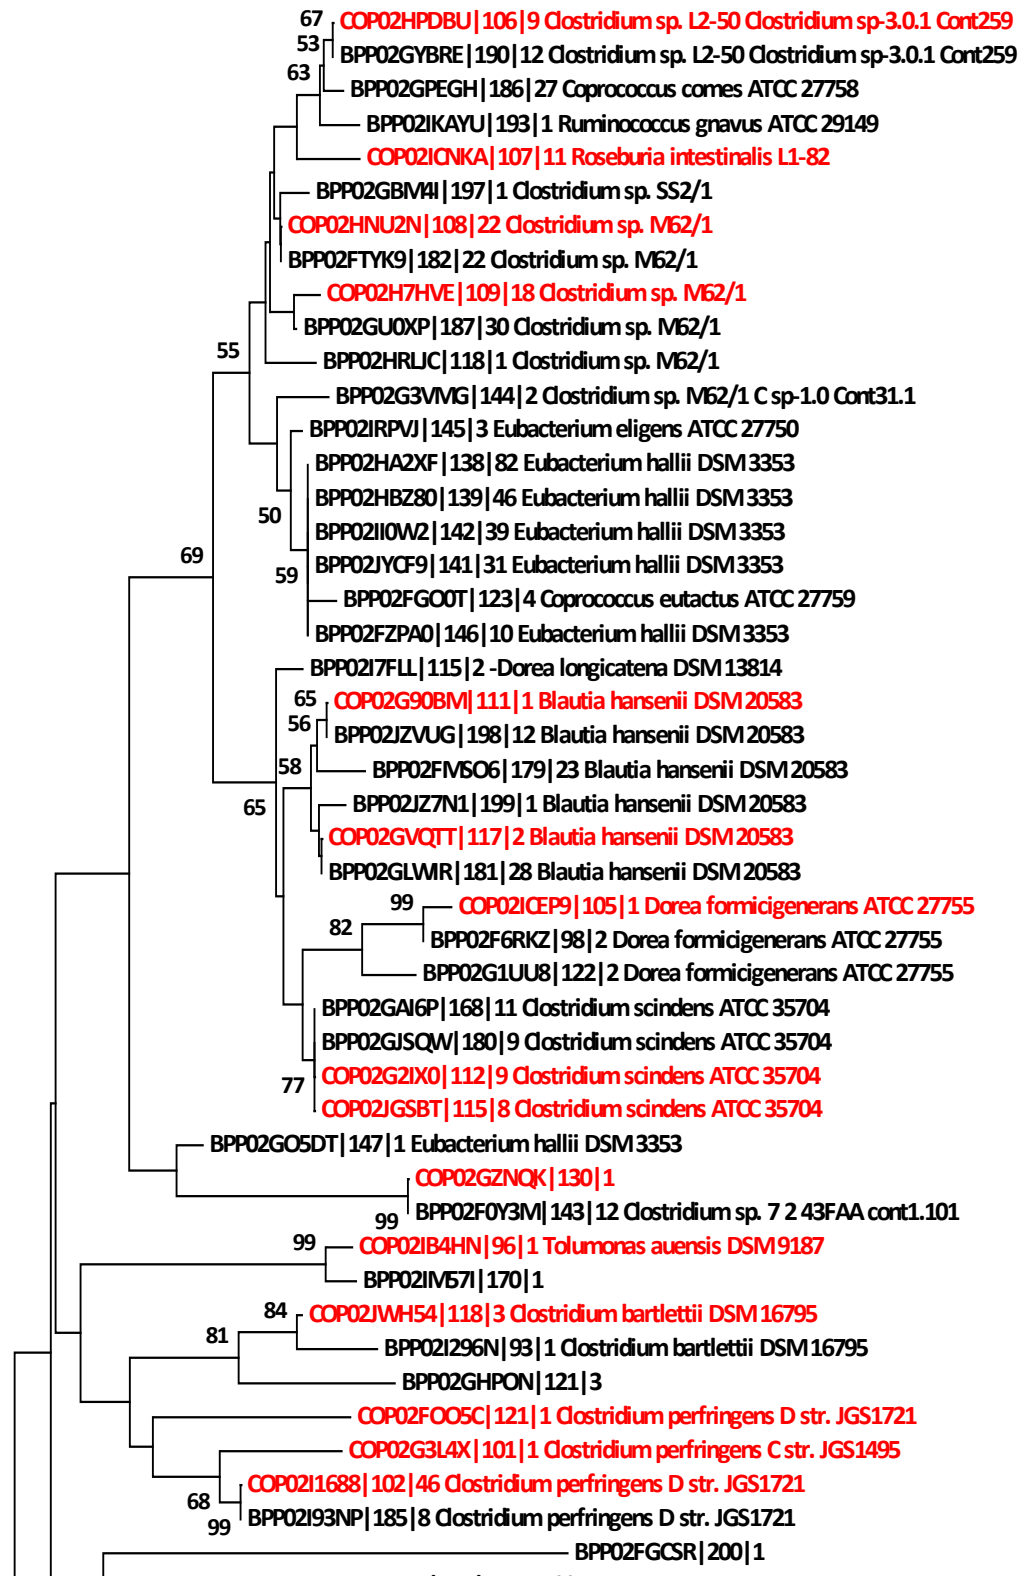

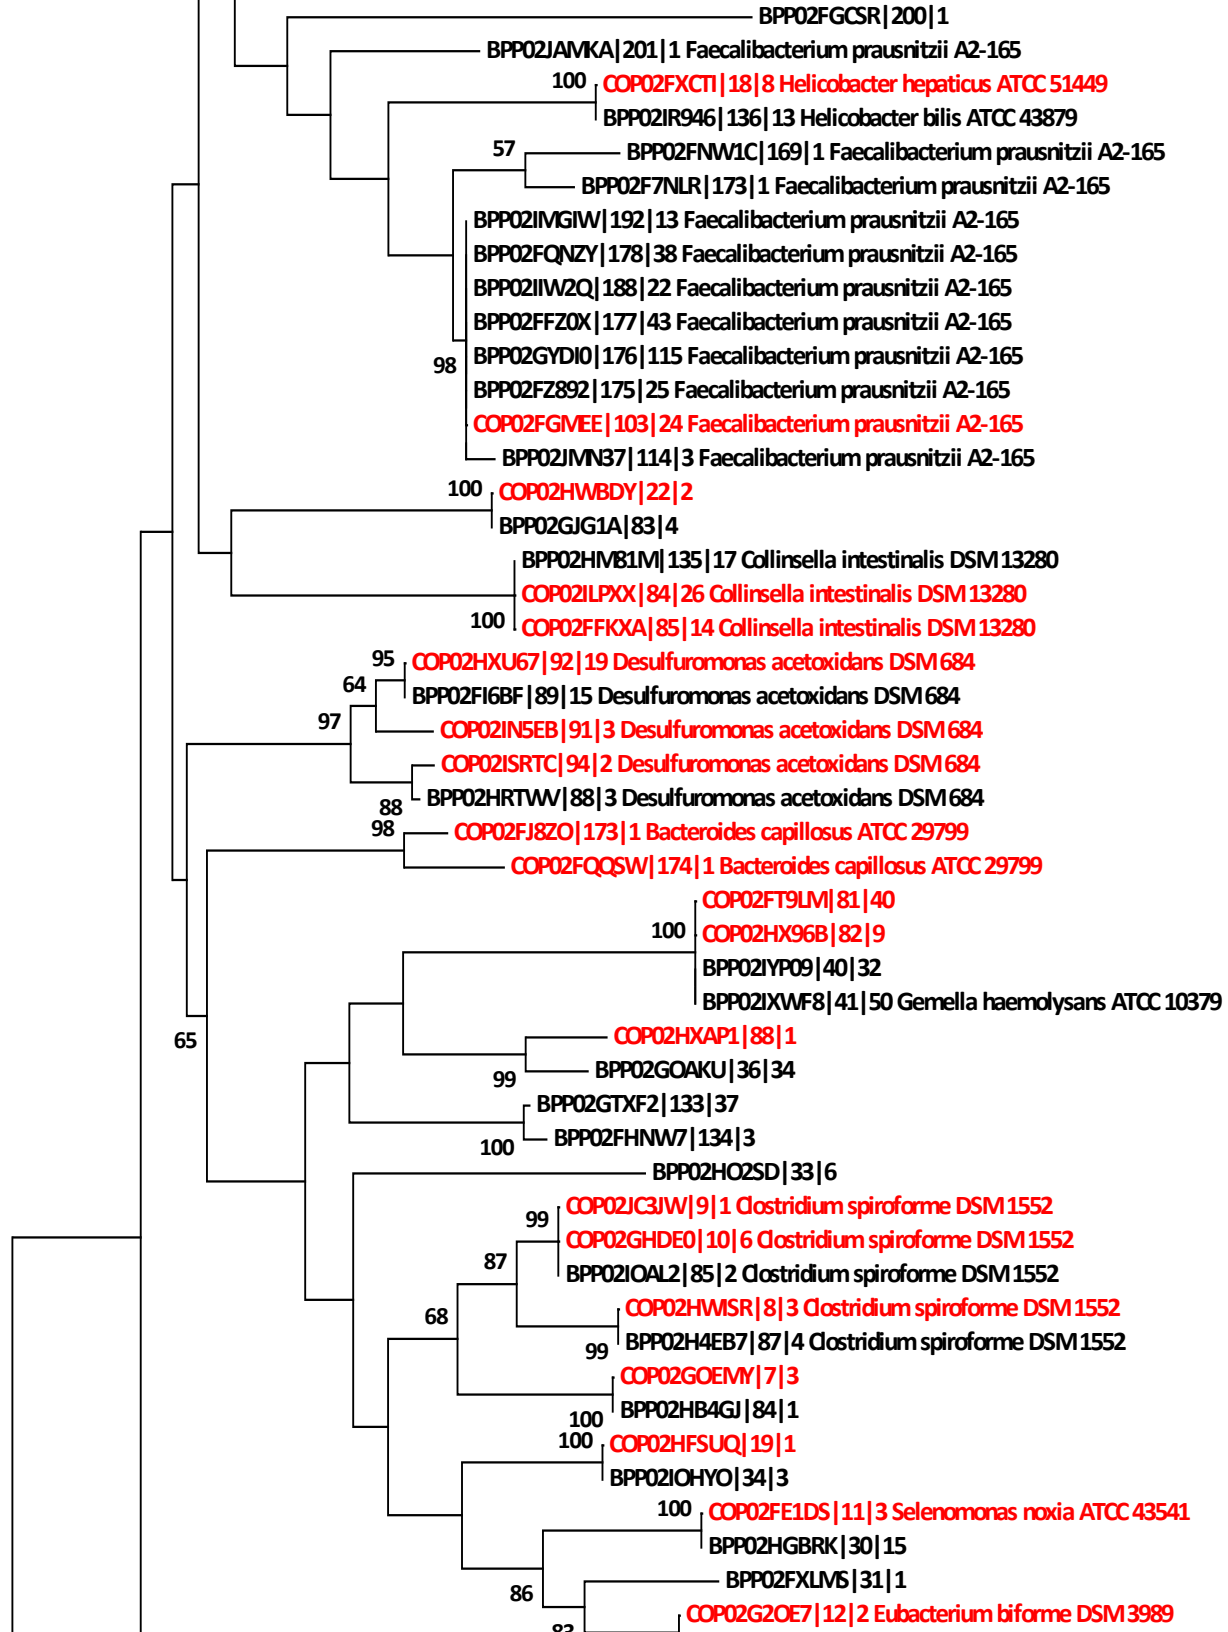

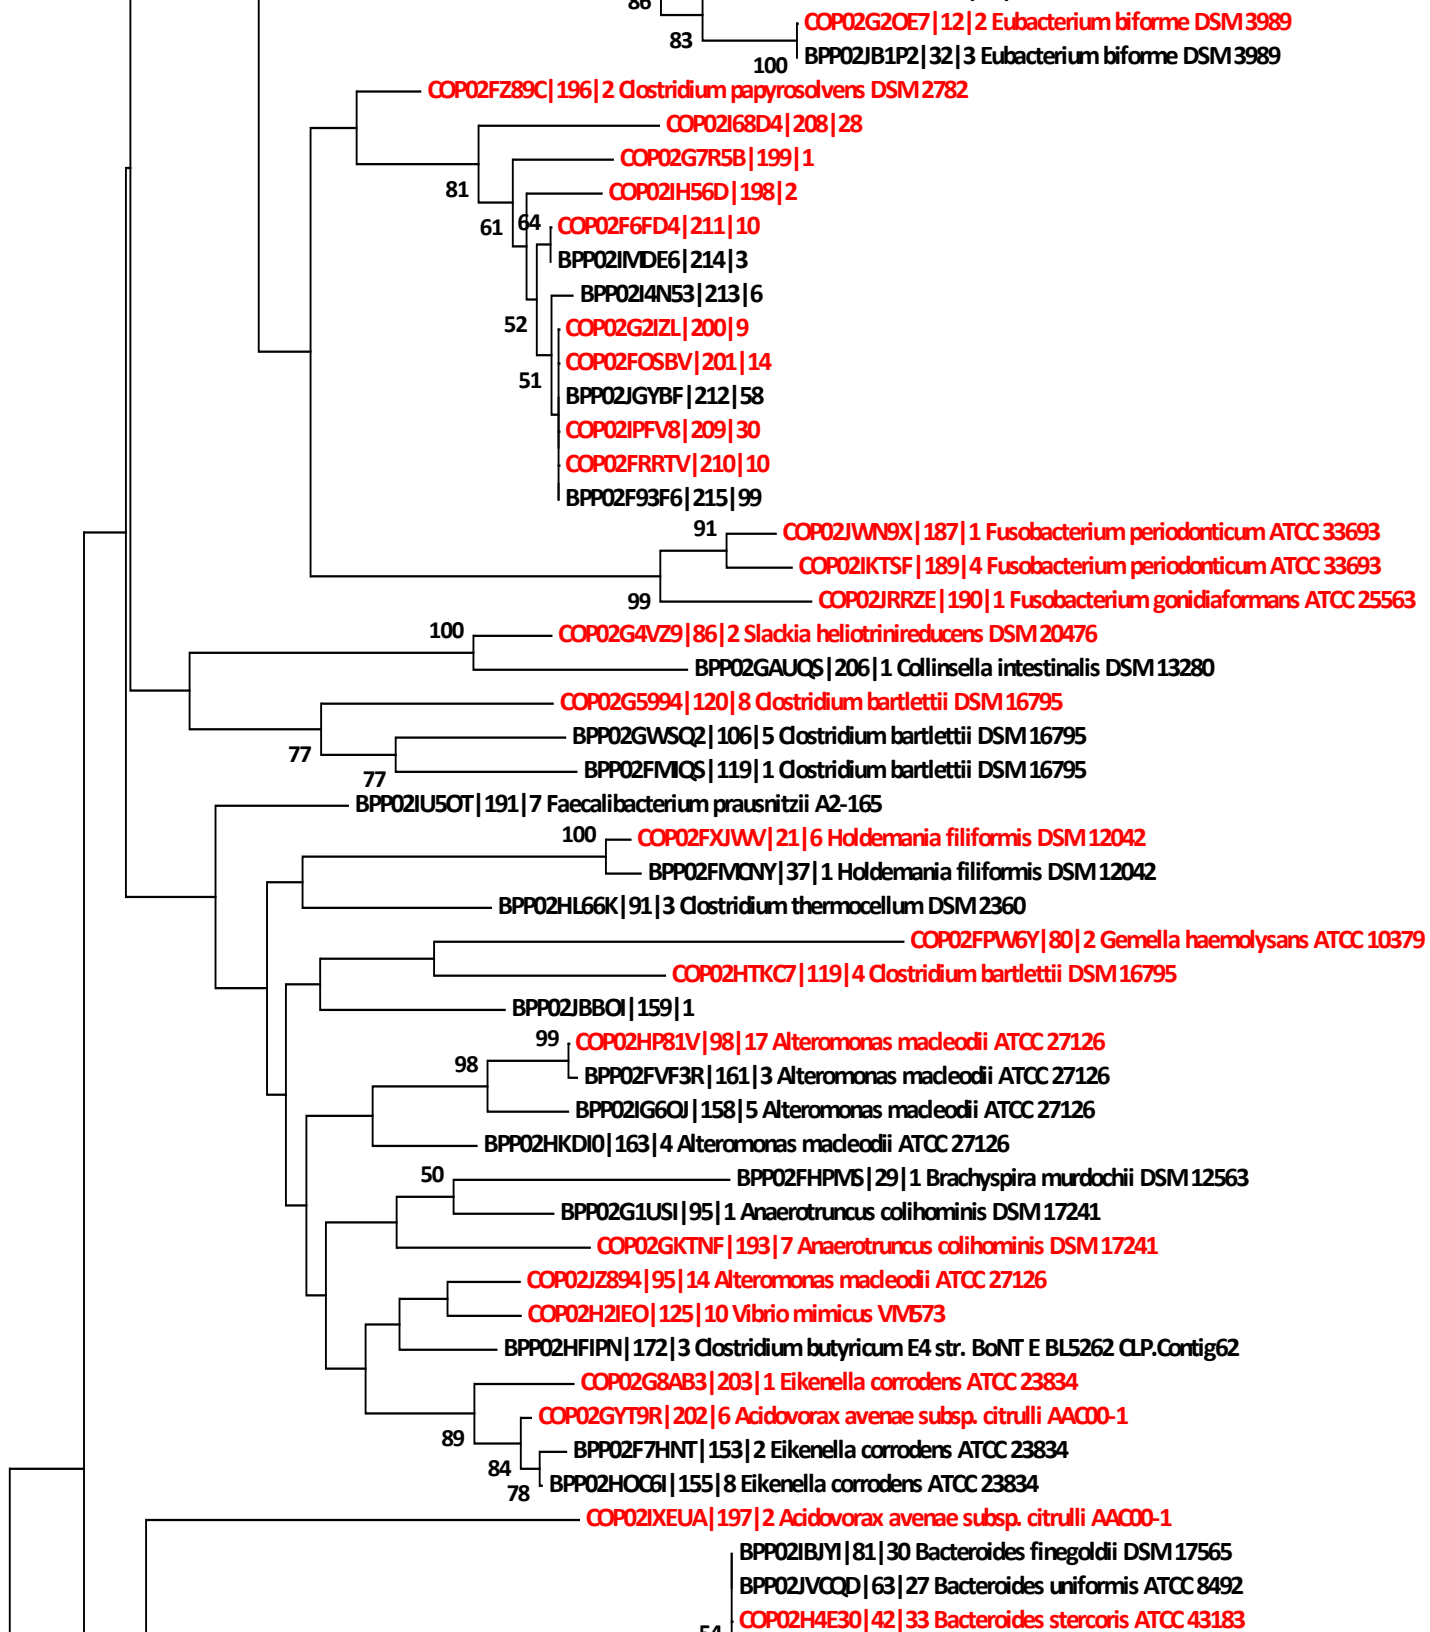

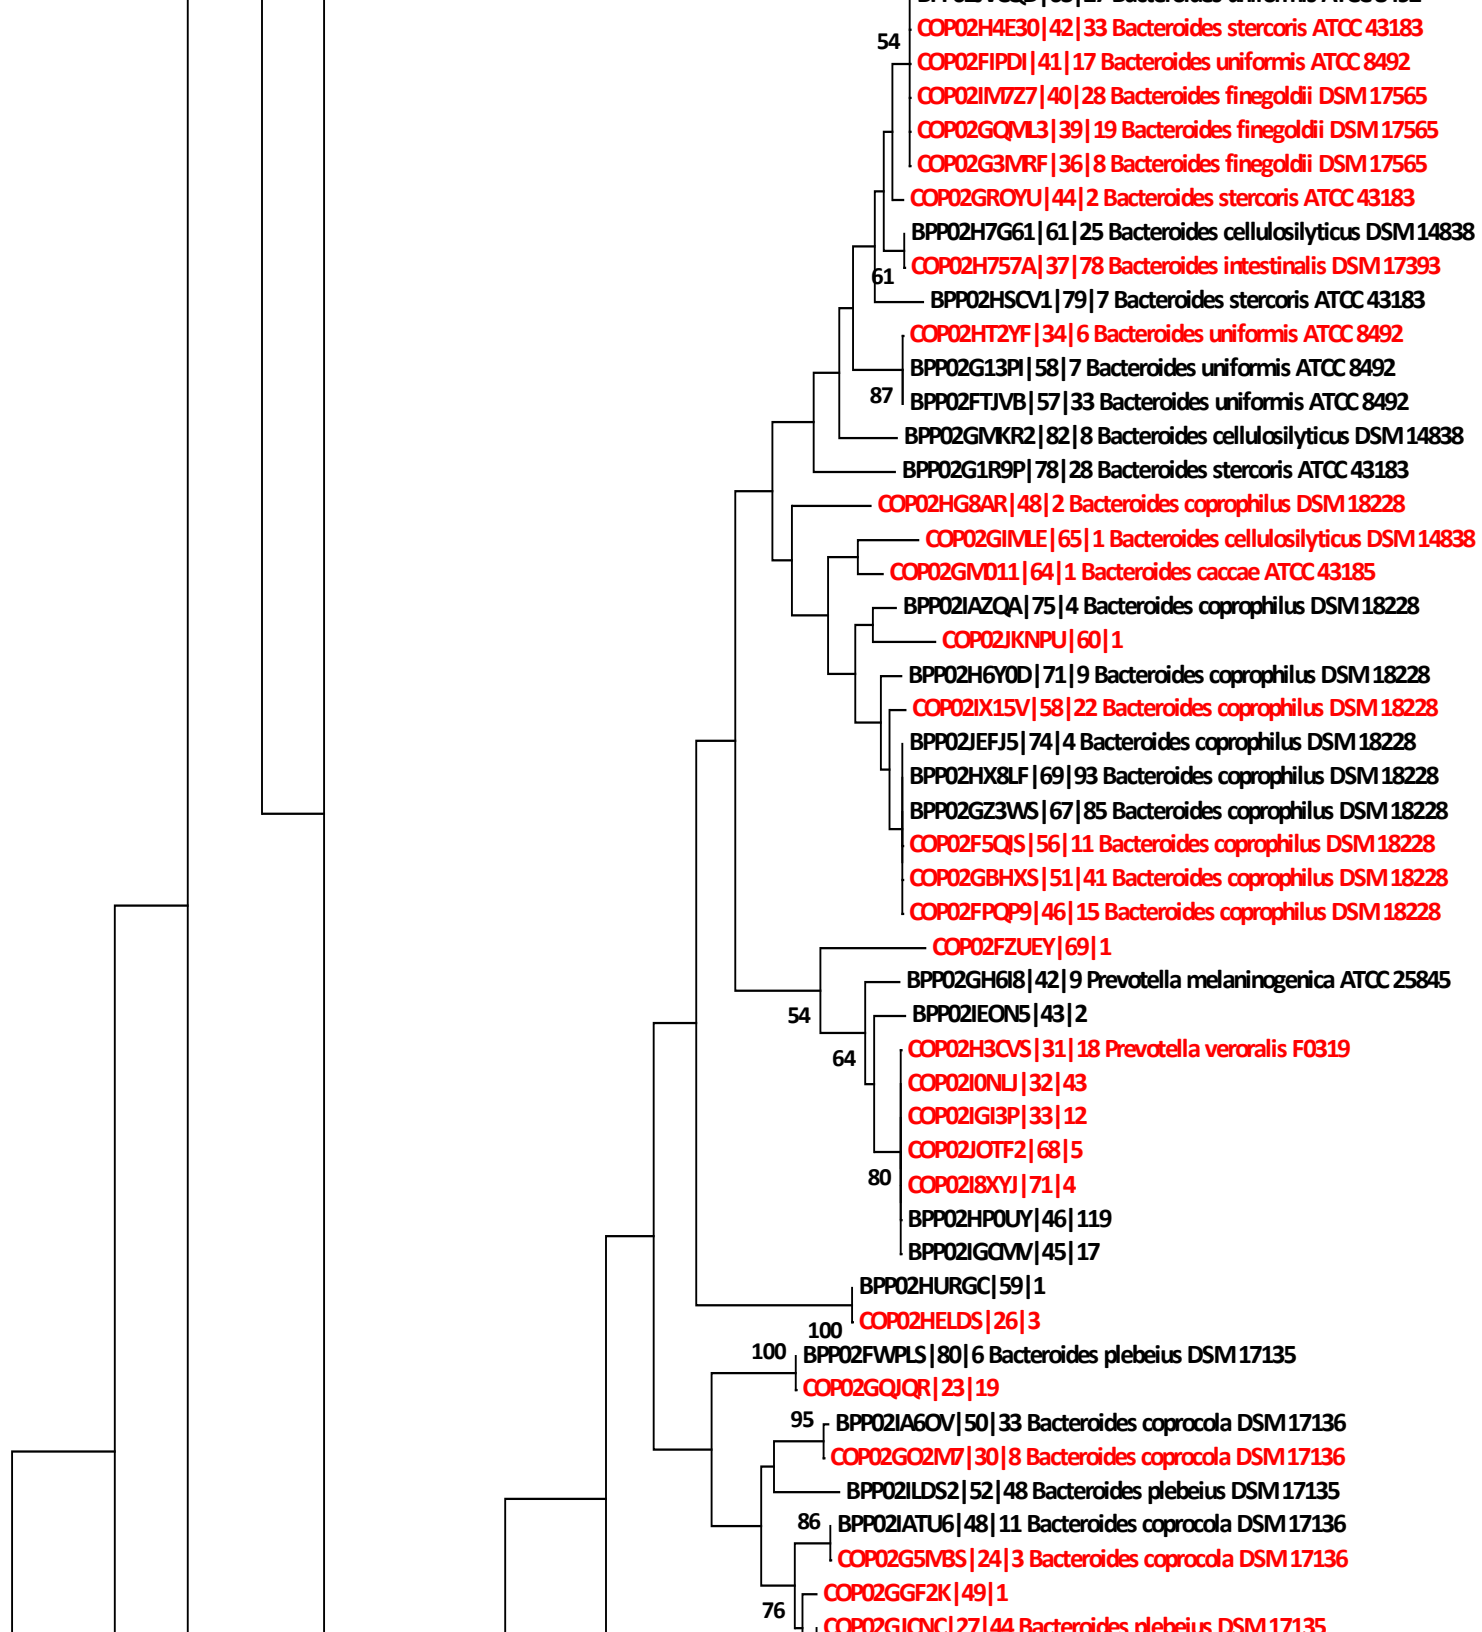

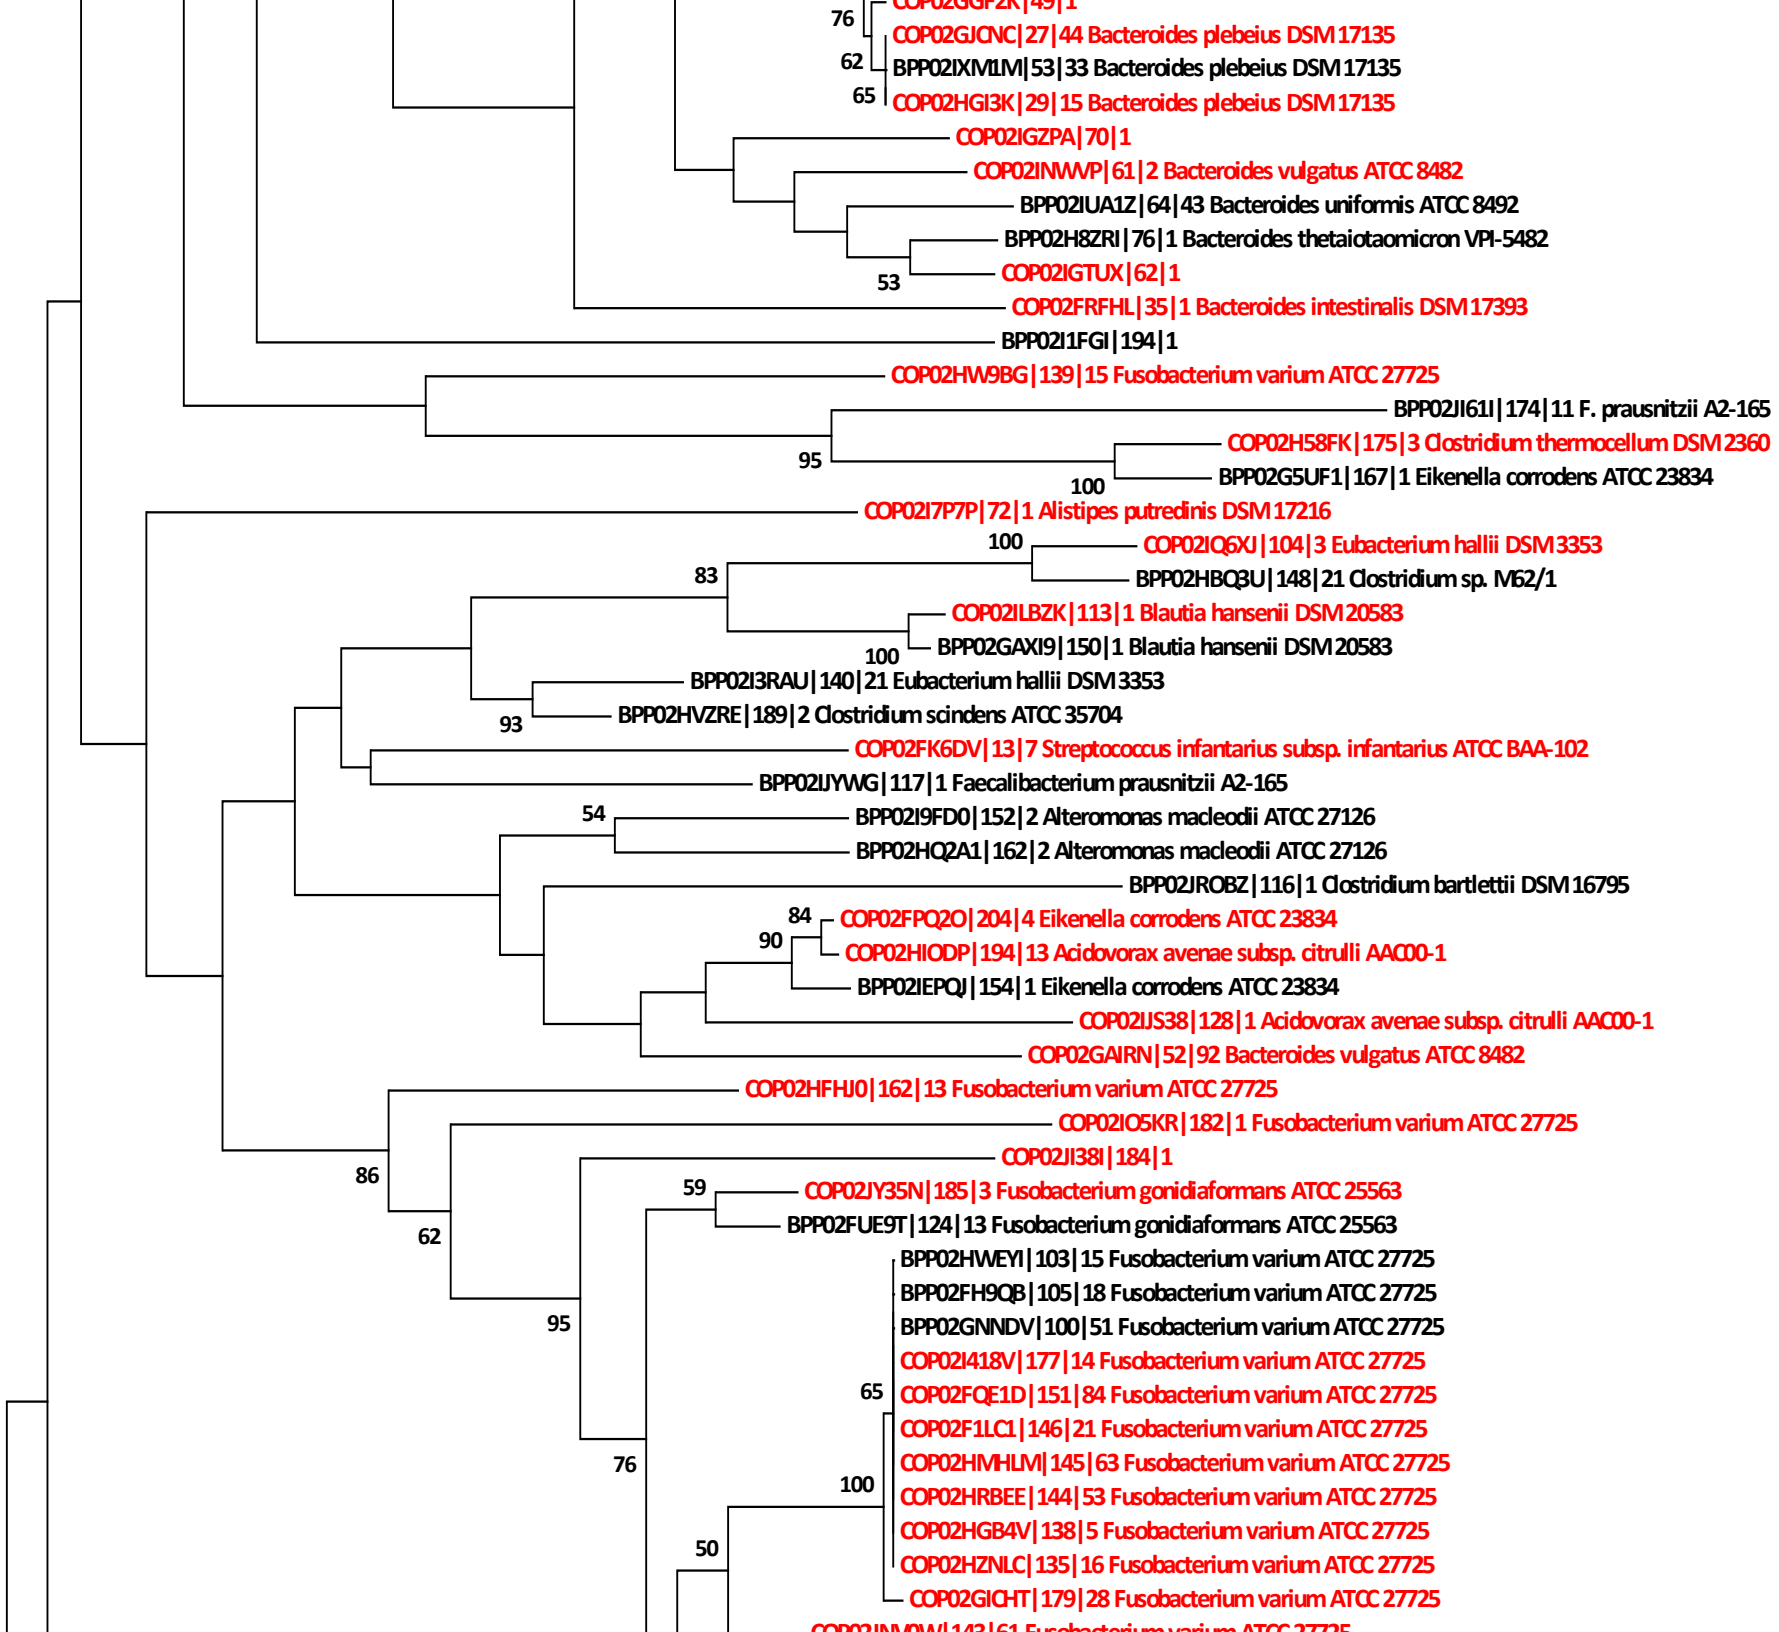

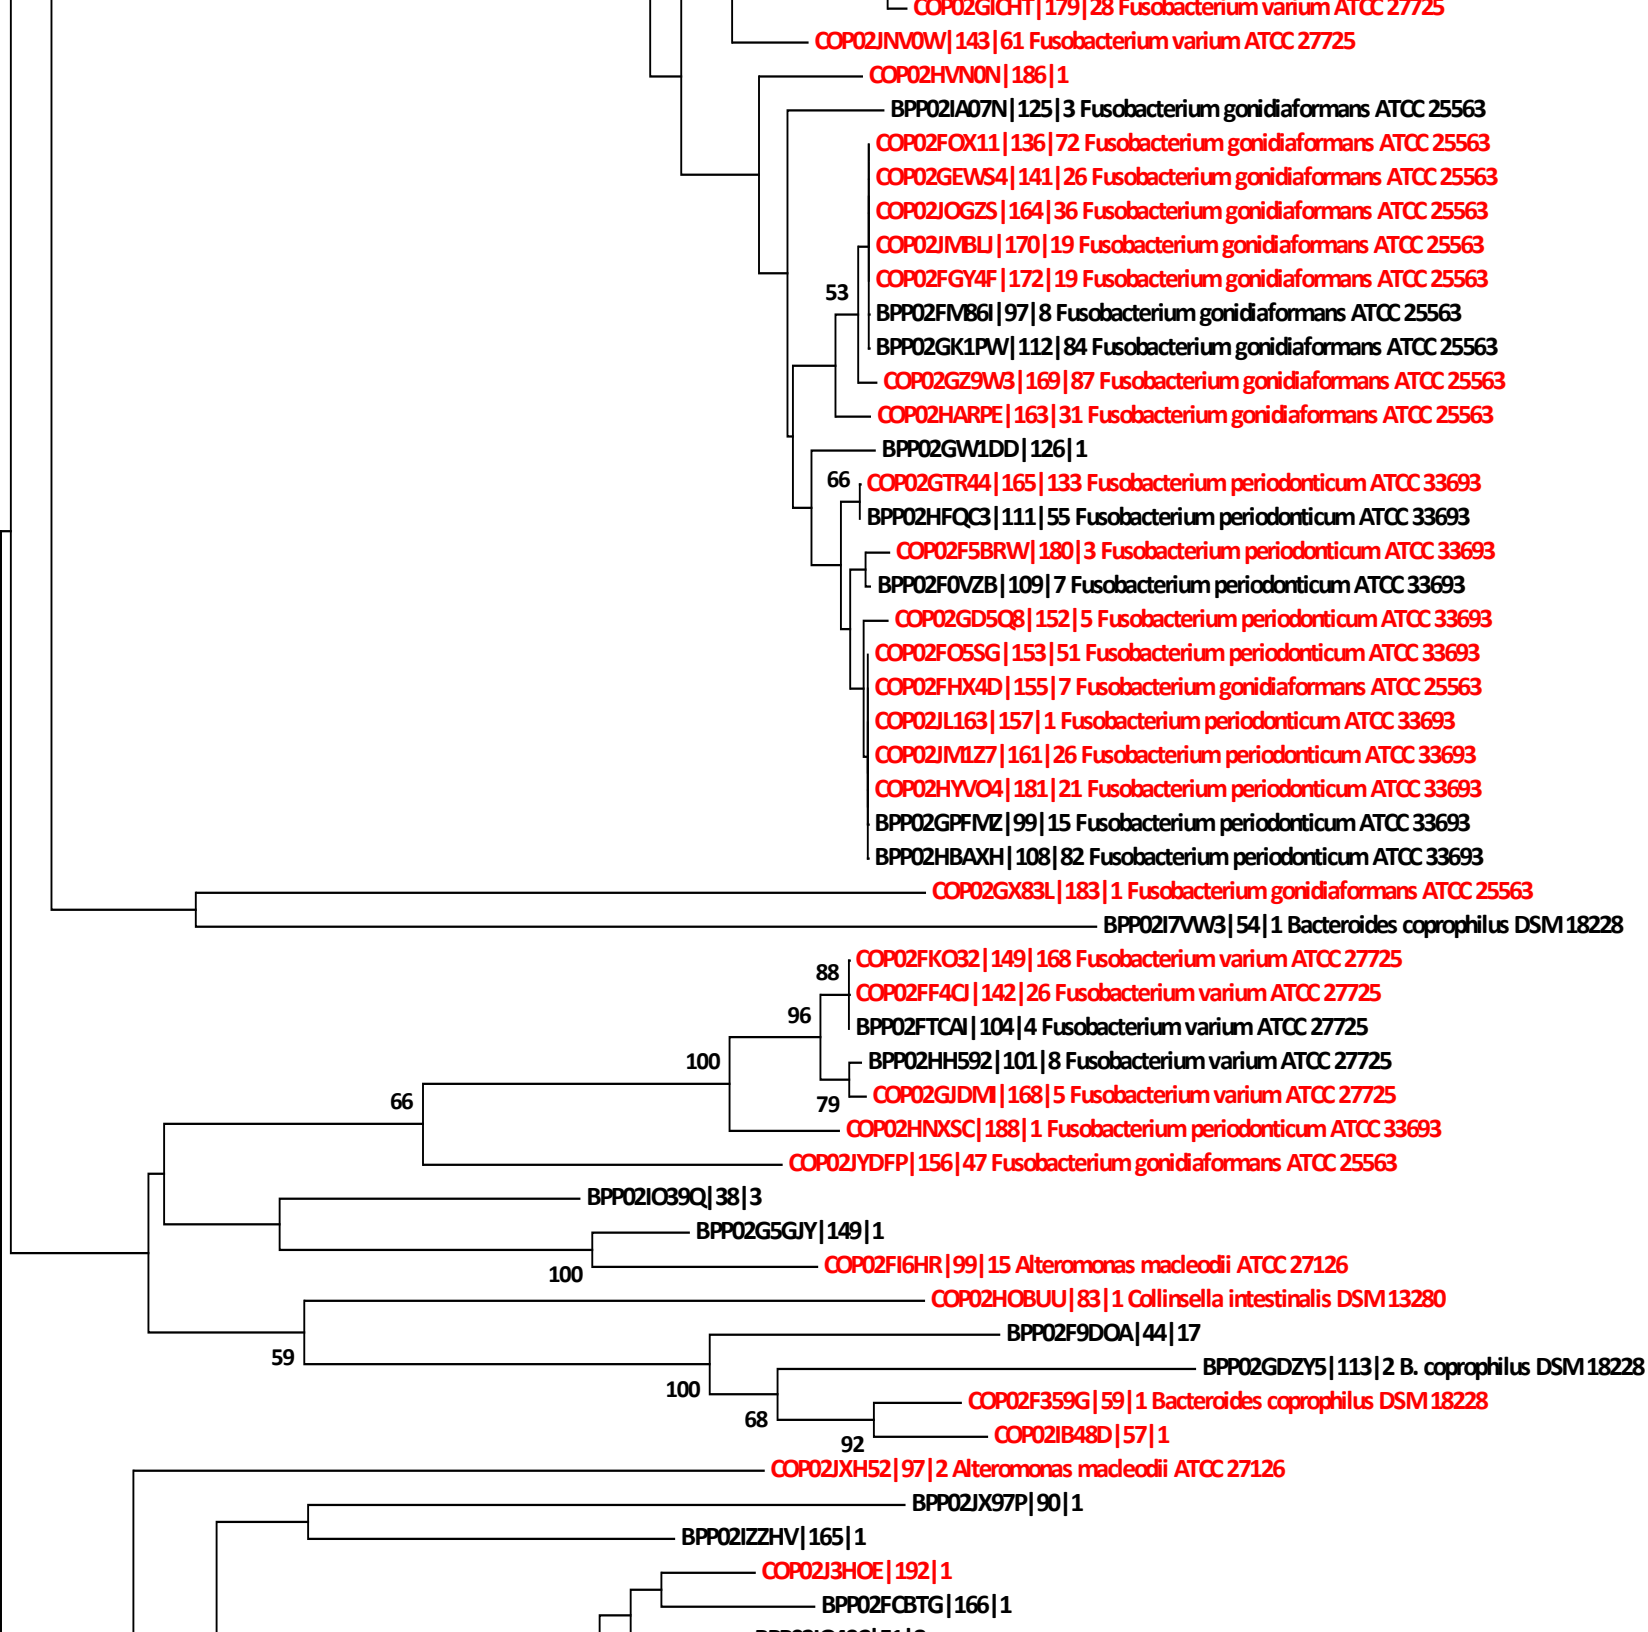

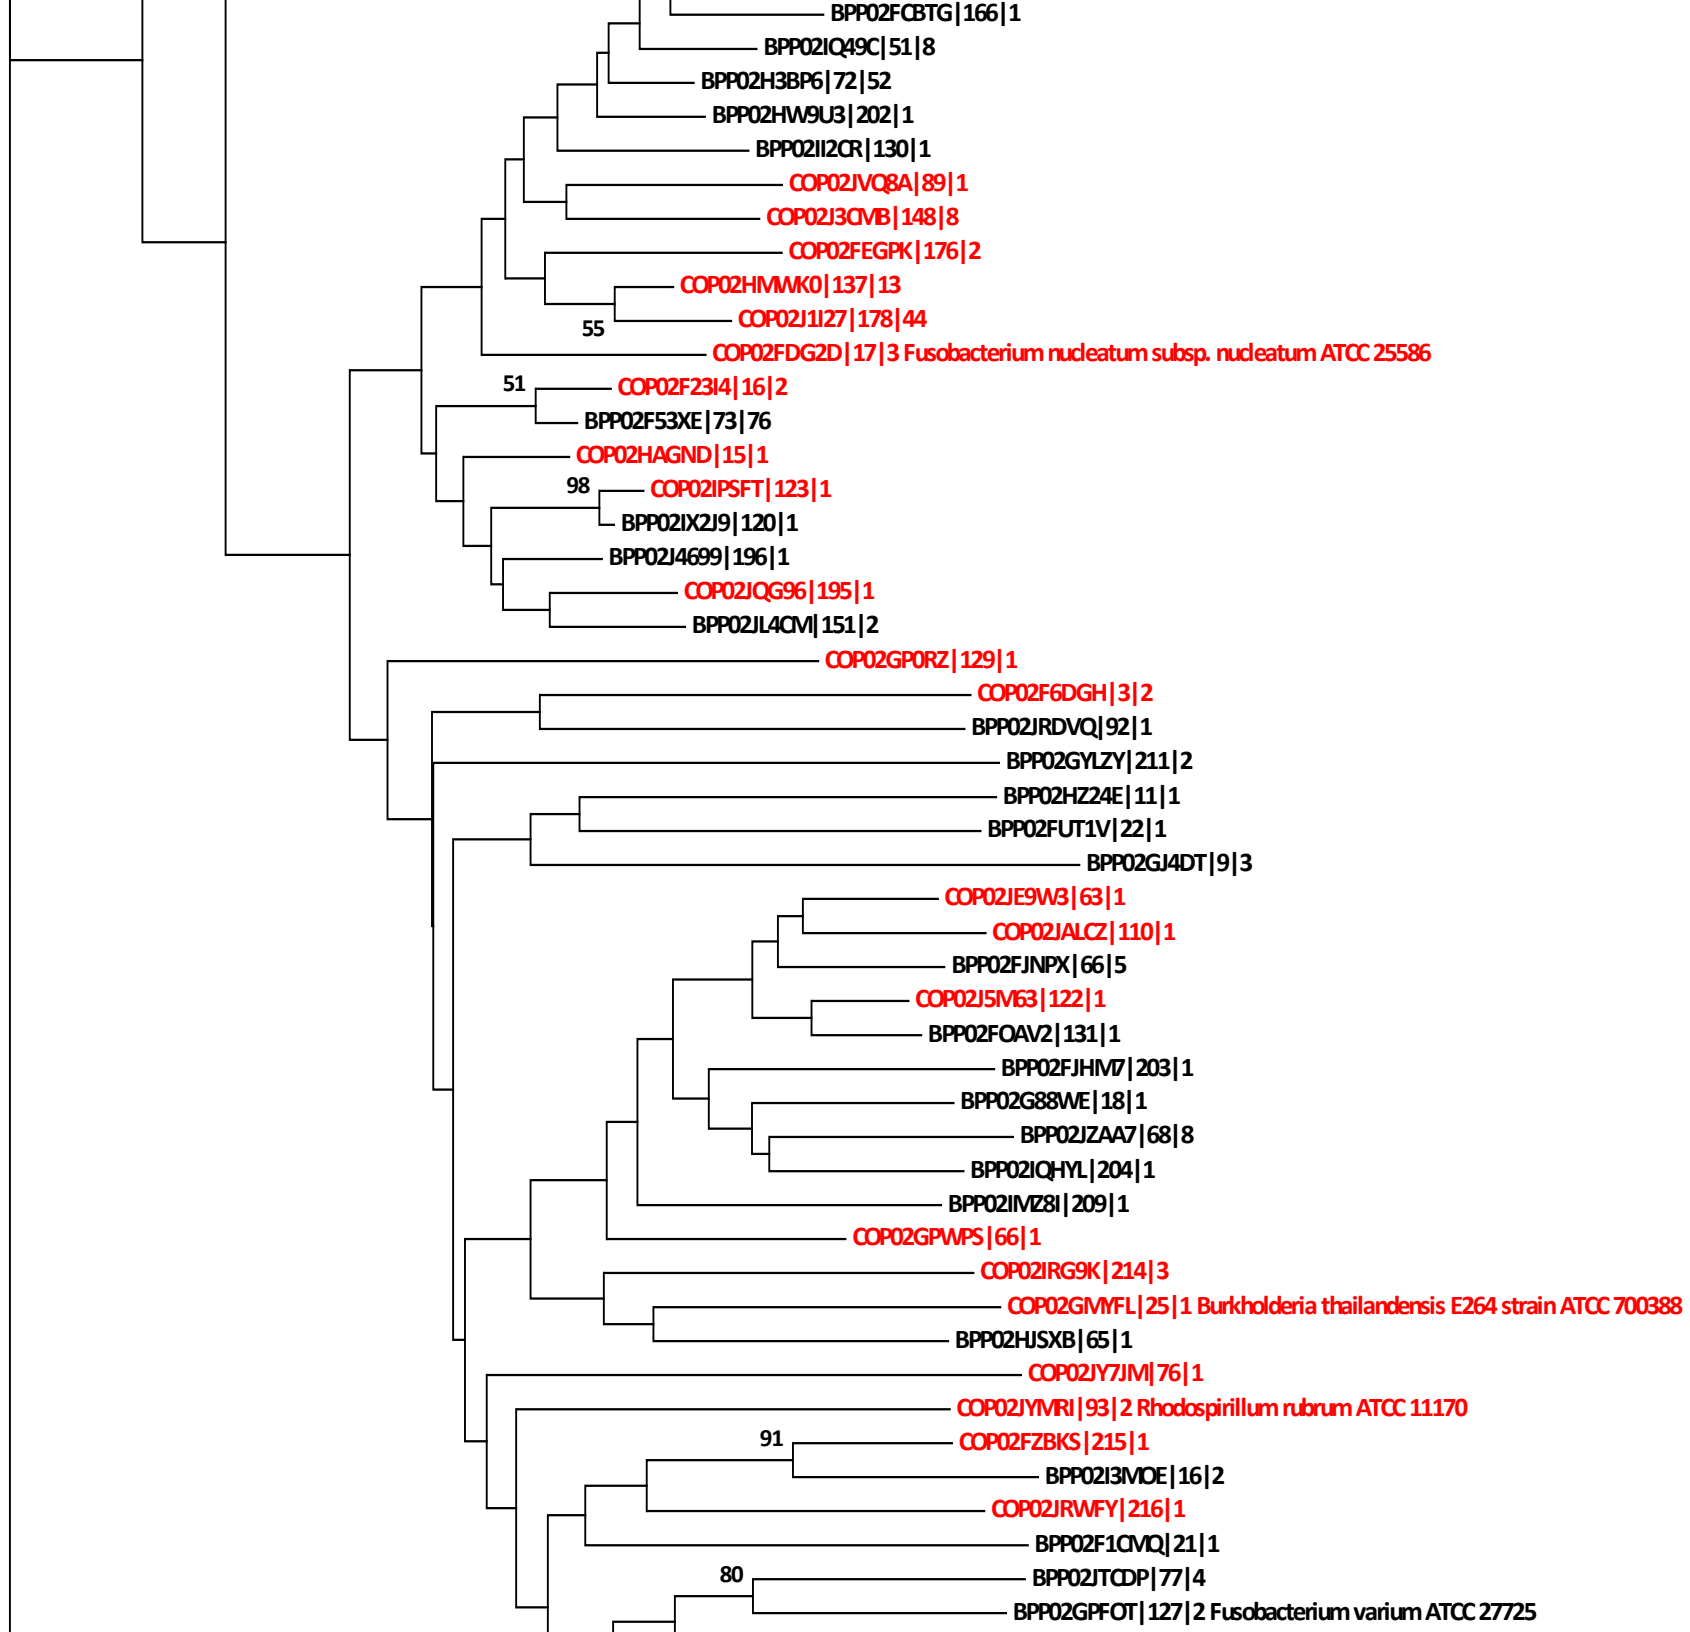

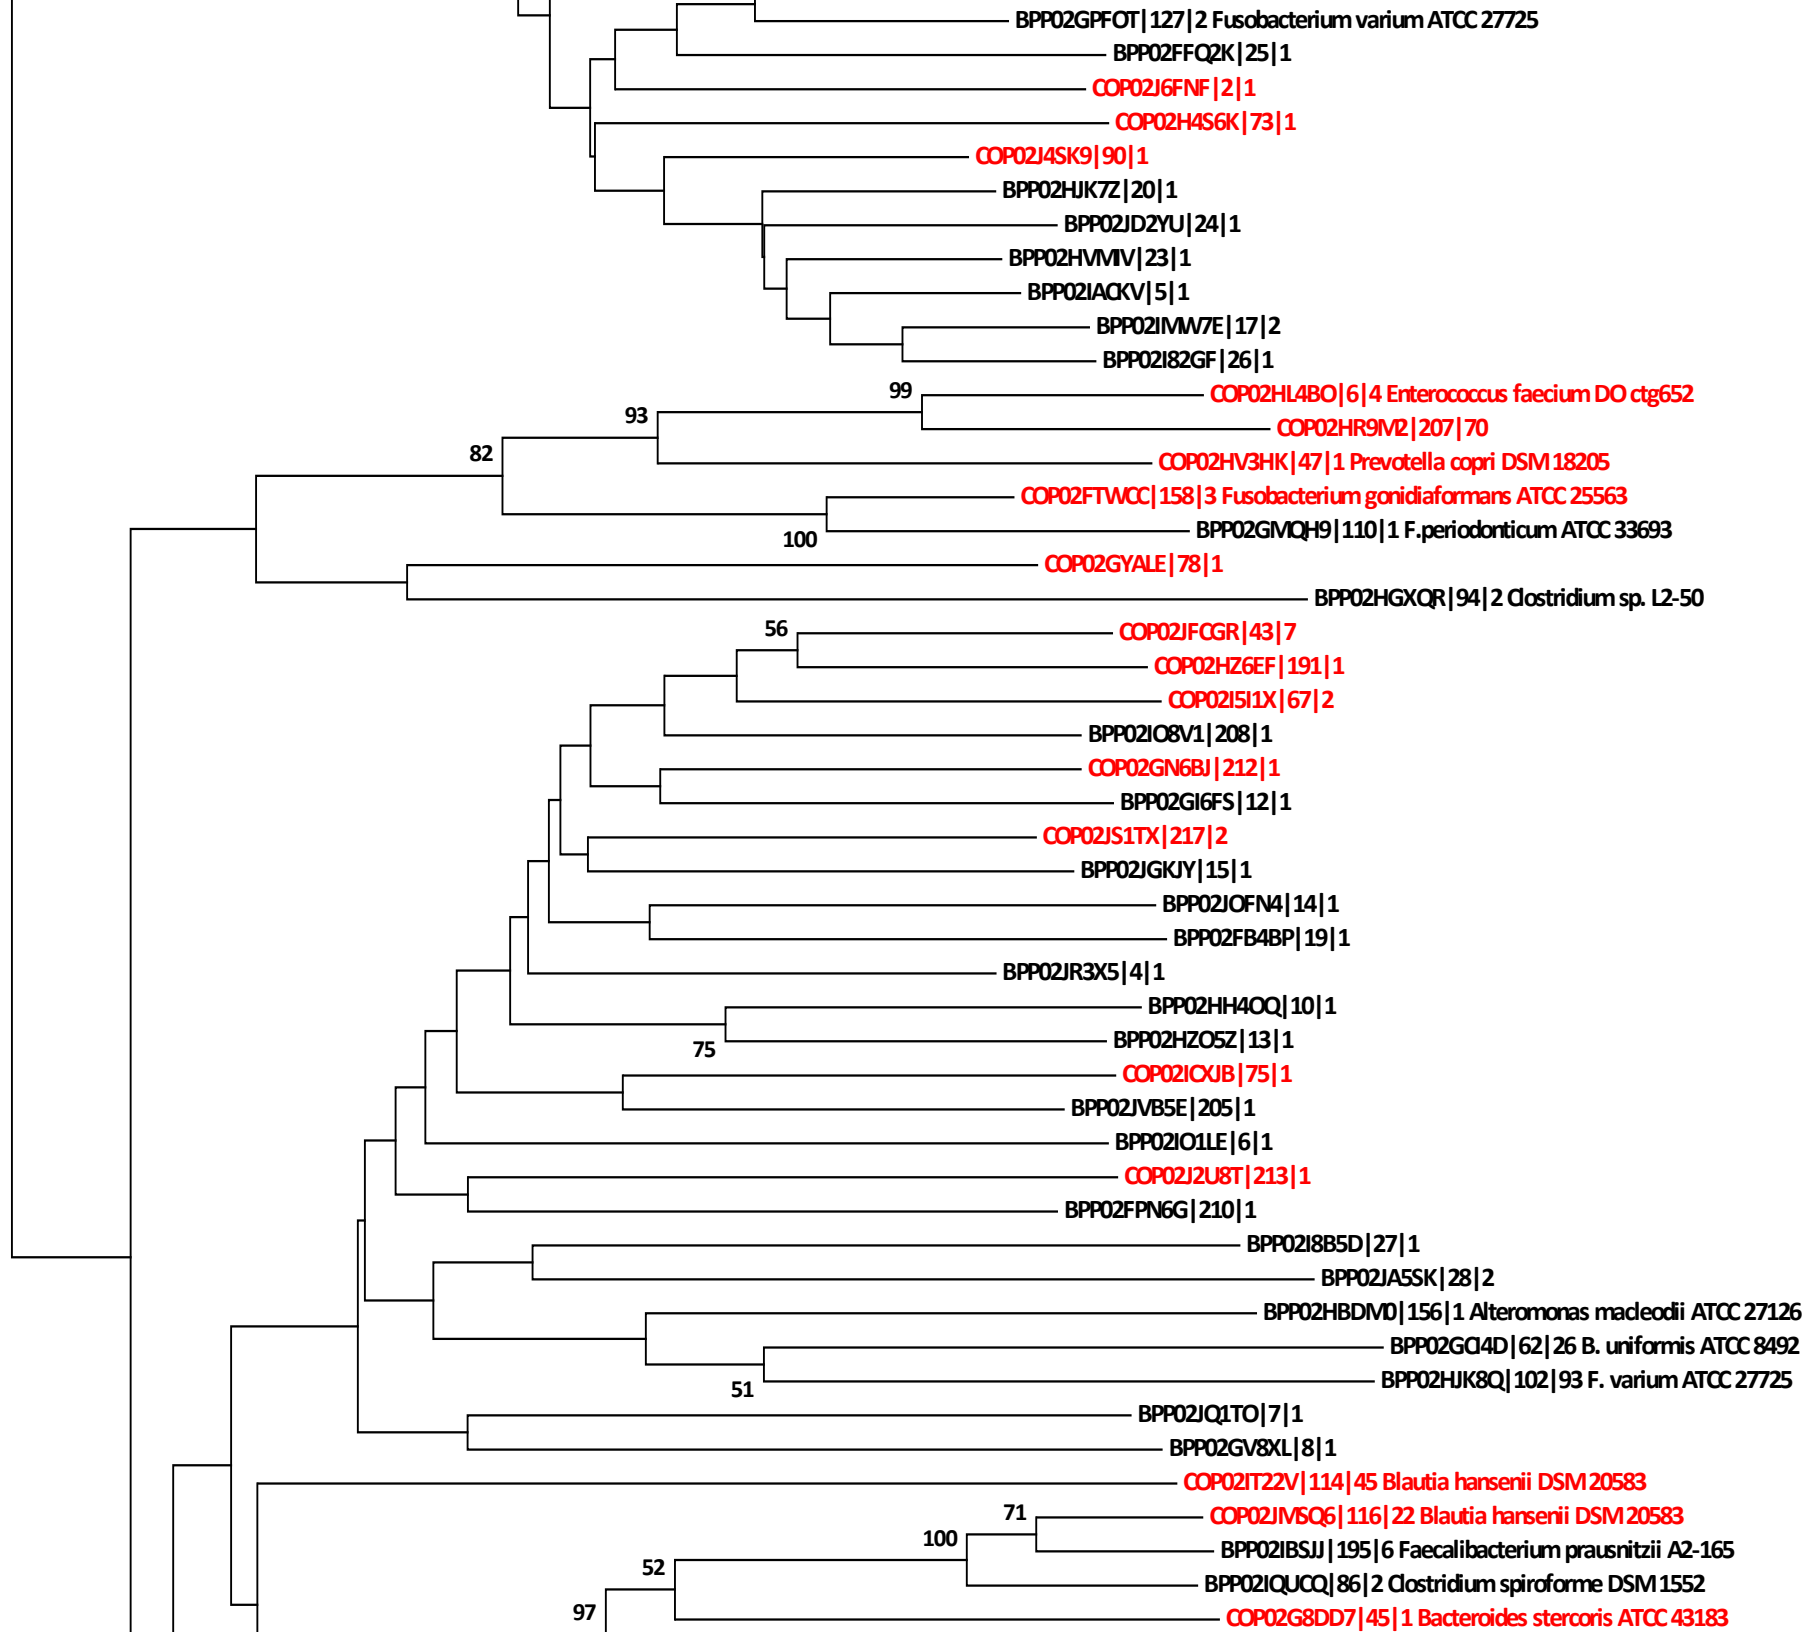



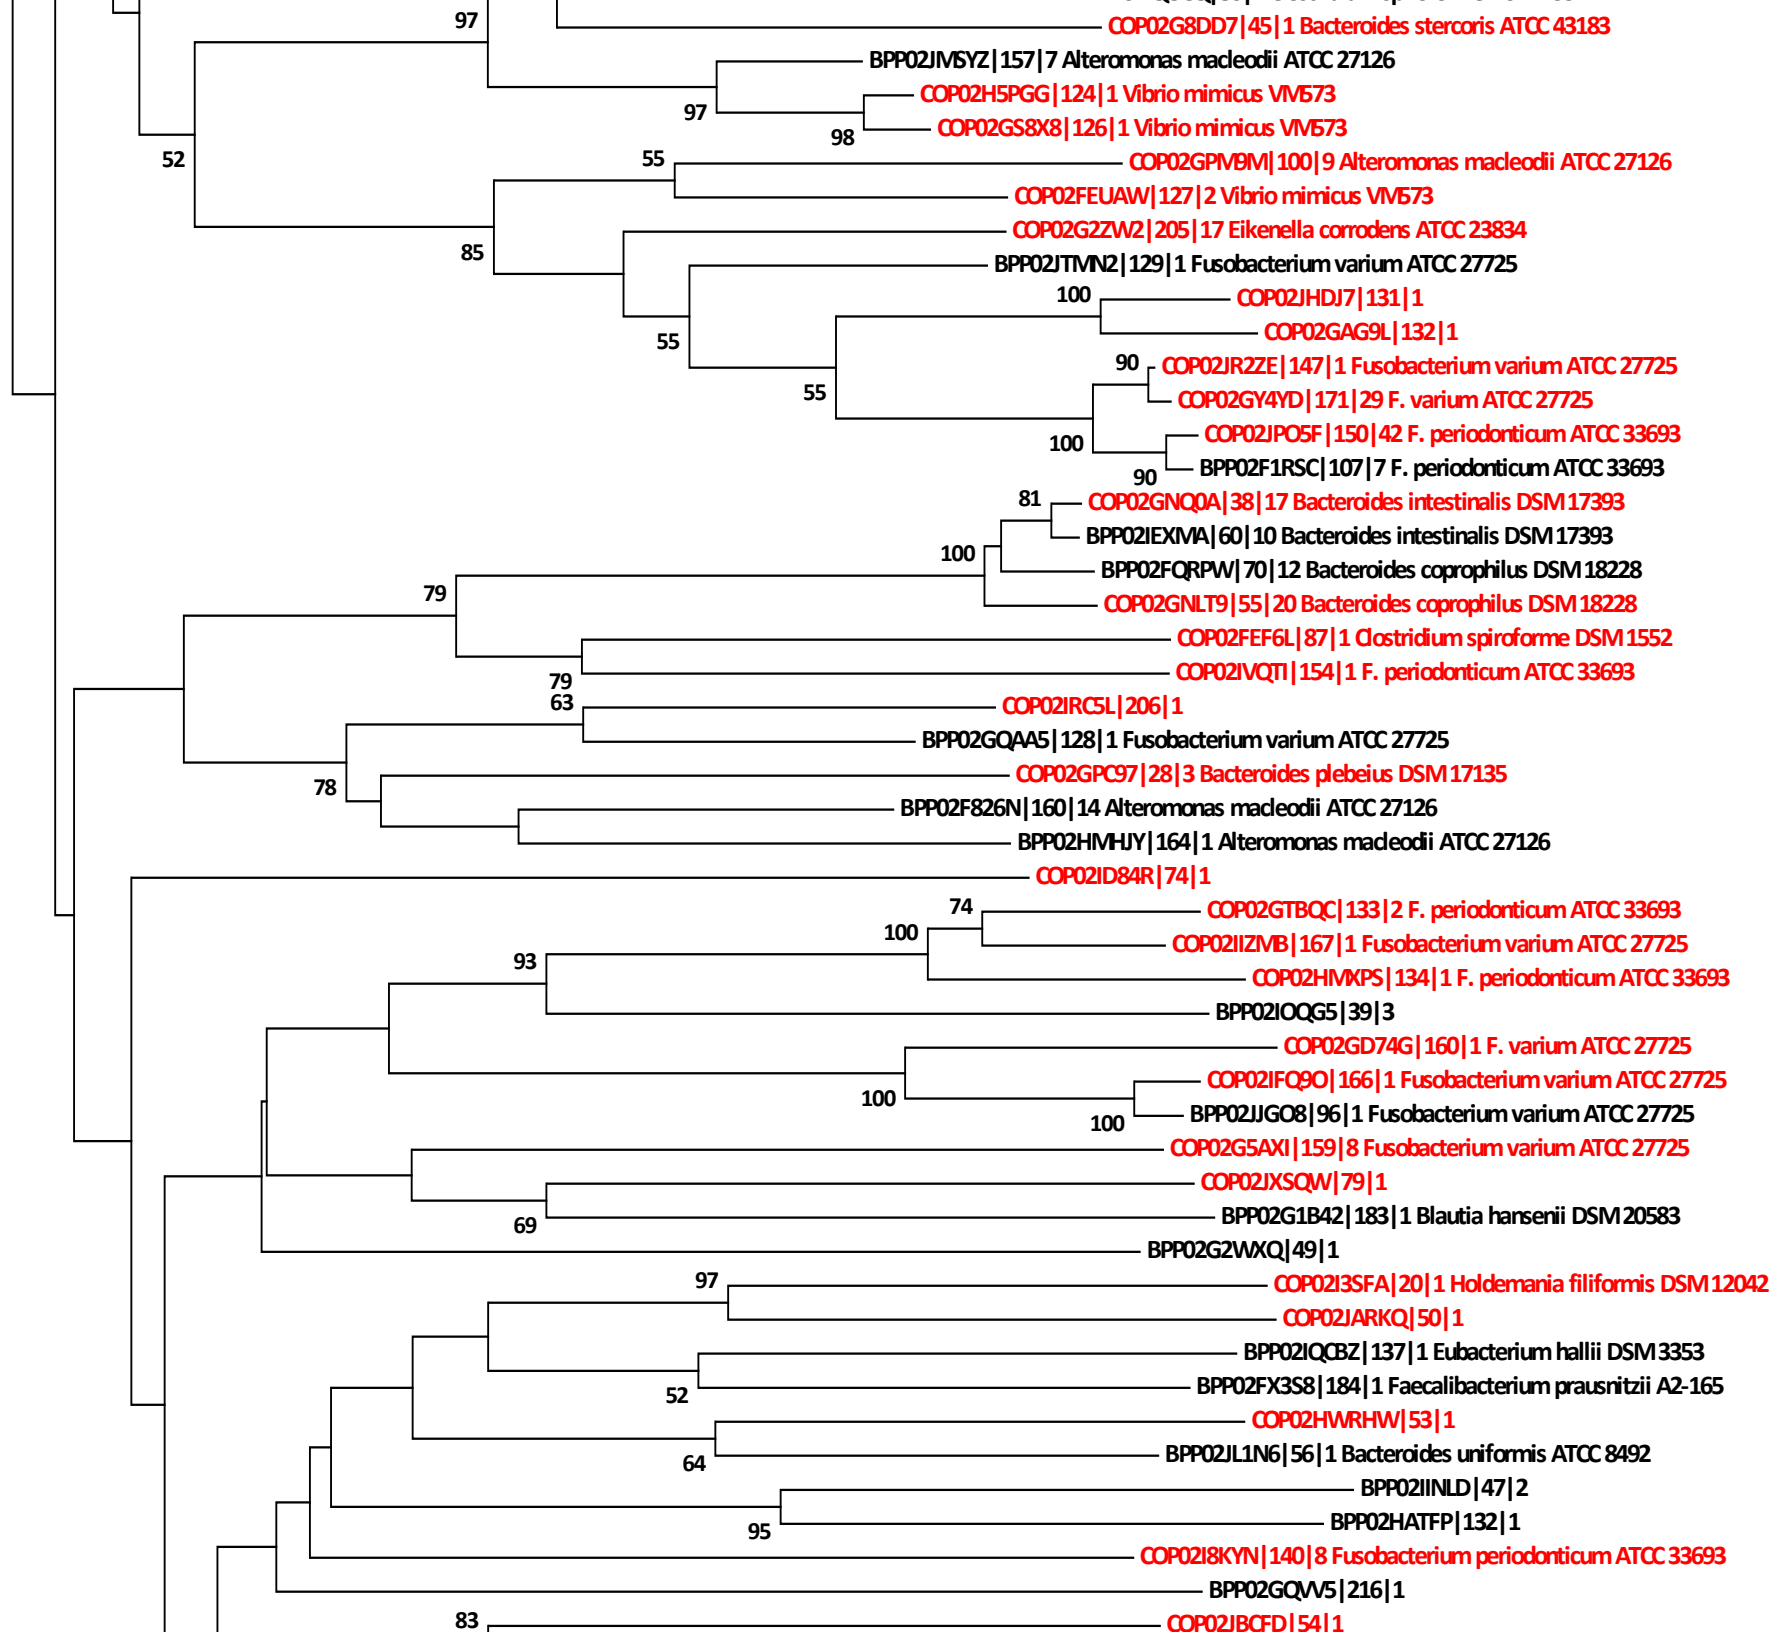

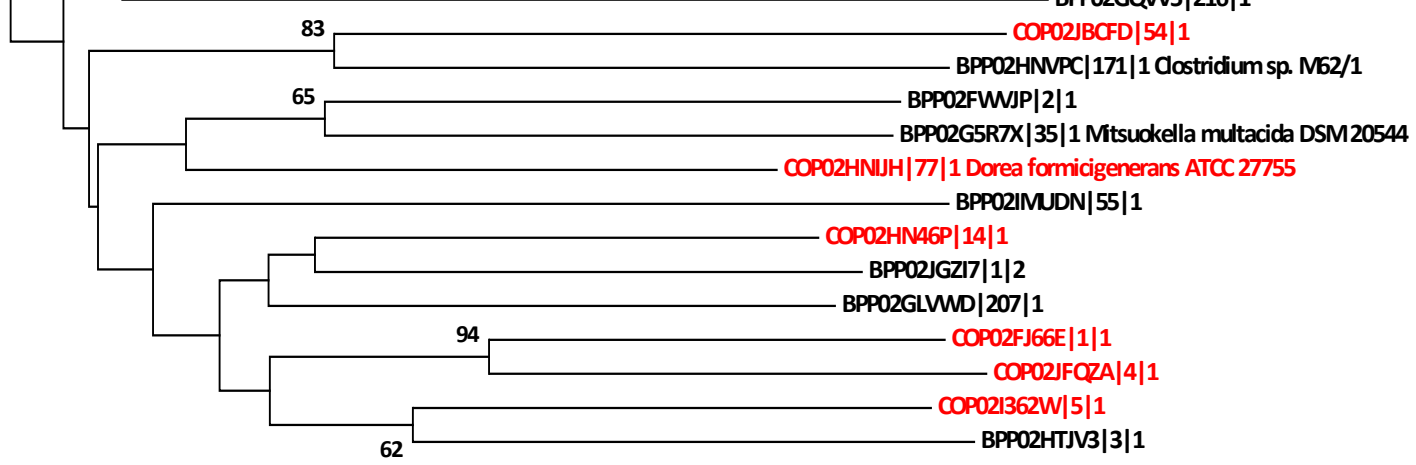

0.05
